# Supplementary material for: Interventions for Early-Stage Pericoronitis: Systematic Review of Randomized Clinical Trials
Source: MDPI journal article supplement (doi:10.3390/antibiotics11010071), 2022-01-08
Supplement: s1 [file s1]

# Interventions for Early-Stage Pericoronitis: Systematic Review of Randomized Clinical Trials

Tânia Oppido Schalch <sup>1</sup>, Ana Luiza Cabrera Martimbiano <sup>2</sup>, Marcela Leticia Leal Gonçalves <sup>2</sup>, Lara Jansiski Motta <sup>1</sup>, Elaine Marcilio Santos <sup>2</sup>, Rebecca Boltes Cecatto <sup>1</sup>, Sandra Kalil Bussadori <sup>1</sup> and Anna Carolina Ratto Tempestini Horliana <sup>1,\*</sup>

<sup>1</sup> University Nove de Julho (UNINOVE), São Paulo 01504-000, Brazil; tanciaschalch@gmail.com (T.O.S.); la-rajmotta@uni9.pro.br (L.J.M.); rebecca.boltes@uni9.pro.br (R.B.C.); sandra.skb@gmail.com (S.K.B.)

<sup>2</sup> Universidade Metropolitana de Santos (UNIMES), São Paulo, Brazil; analuizacabrera@hotmail.com (A.L.C.M.); marcelalleal@hotmail.com (M.L.L.G.); elaine.marcilio@unimes.br (E.M.S.)

\* Correspondence: annacrth@gmail.com; Tel.: +55-(11)-3385-9222

## Supplementary Materials

**Table S1.** Risk of bias assessment – judgement details.

| Study (author year)   | Sequence generation                                                                                                                                                  | Allocation concealment                                                  | Blinding participants/ personnel                                                                                                                                                    | Blinding outcome assessors                                                                                                                                                          | Incomplete outcome | Selective reporting                                                                                                                          | Other bias                      |
|-----------------------|----------------------------------------------------------------------------------------------------------------------------------------------------------------------|-------------------------------------------------------------------------|-------------------------------------------------------------------------------------------------------------------------------------------------------------------------------------|-------------------------------------------------------------------------------------------------------------------------------------------------------------------------------------|--------------------|----------------------------------------------------------------------------------------------------------------------------------------------|---------------------------------|
| Alalwani et al., 2019 | UNCLEAR<br>Quote: "Patients who met the inclusion criteria were randomly assigned to three groups". Comment: Insufficient information on random sequence generation. | UNCLEAR<br>Comment: Insufficient information on allocation concealment. | LOW<br>Quote: "The study medications were provided to the patients by the same clinic nurse, and the patients and the researchers were blinded to the study medication allocation." | LOW<br>Quote: "The study medications were provided to the patients by the same clinic nurse, and the patients and the researchers were blinded to the study medication allocation." | LOW<br>No losses   | HIGH<br>Comment: The trial was registered (NCT03745599), but the paper did not report one important planned outcome (pain, measured by VAS). | LOW<br>No other sources of bias |
| Culhane et al., 1957  | UNCLEAR<br>Quote: "Eighteen patients selected at random from those applying for treatment"                                                                           | UNCLEAR<br>Comment: Insufficient information on                         | HIGH<br>Comment: Blinding of participants and personnel was                                                                                                                         | HIGH<br>Comment: Blinding of outcome assessors was                                                                                                                                  | LOW<br>No losses   | UNCLEAR<br>Study protocol not available.                                                                                                     | LOW<br>No other sources of bias |

|                             |                                                                                                                                                                                                                                                                                                                                        |                                                                                                                                                                                                                      |                                                                                                                                                                                                          |                                                                                                                                                                                                 |                                         |                                                                                                  |                                            |
|-----------------------------|----------------------------------------------------------------------------------------------------------------------------------------------------------------------------------------------------------------------------------------------------------------------------------------------------------------------------------------|----------------------------------------------------------------------------------------------------------------------------------------------------------------------------------------------------------------------|----------------------------------------------------------------------------------------------------------------------------------------------------------------------------------------------------------|-------------------------------------------------------------------------------------------------------------------------------------------------------------------------------------------------|-----------------------------------------|--------------------------------------------------------------------------------------------------|--------------------------------------------|
|                             | <p><i>at the dental clinic comprised the group reported here."</i></p> <p>Comment:</p> <p>Insufficient information on random sequence generation.</p>                                                                                                                                                                                  | allocation concealment.                                                                                                                                                                                              | unconfirmed and the interventions regimen were different. The subjective outcomes is likely to be influenced by this fact.                                                                               | unconfirmed and the interventions regimen were different. The subjective outcomes is likely to be influenced by this fact.                                                                      |                                         |                                                                                                  |                                            |
| <b>Elsadek et al., 2020</b> | <p>UNCLEAR</p> <p>Quote: <i>"Randomization technique was performed using block randomization. A total of 5 blocks of 6 participants were made for each group. The recruitment was done with the ratio of 1:1 and assigned letters 'X' and 'Y'."</i></p> <p>Comment:</p> <p>Insufficient information on random sequence generation.</p> | <p>LOW</p> <p>Quote: <i>"Each recruited participant was given a code and masked in the envelope and identified with sequential numbers."</i></p> <p>Comment:</p> <p>Allocation concealment adequately described.</p> | <p>HIGH</p> <p>Blinding of participants and personnel was unconfirmed and the interventions regimen were different. The subjective outcomes is likely to be influenced by this fact.</p>                 | <p>HIGH</p> <p>Blinding of outcome assessors was unconfirmed and the interventions regimen were different. The subjective outcomes is likely to be influenced by this fact.</p>                 | <p>LOW</p> <p>No substantial losses</p> | <p>LOW</p> <p>Quote: <i>"registered in the research clinical trial database (GH062254)".</i></p> | <p>LOW</p> <p>No other sources of bias</p> |
| <b>Eroglu et al., 2018</b>  | <p>UNCLEAR</p> <p>Quote: <i>"The patients were randomly allocated to two groups"</i> .</p> <p>Comment:</p> <p>Insufficient information on random sequence generation.</p>                                                                                                                                                              | <p>UNCLEAR</p> <p>Comment:</p> <p>Insufficient information on allocation concealment.</p>                                                                                                                            | <p>HIGH</p> <p>Comment:</p> <p>Blinding of participants and personnel was unconfirmed and the interventions regimen were different. The subjective outcomes is likely to be influenced by this fact.</p> | <p>HIGH</p> <p>Comment:</p> <p>Blinding of outcome assessors was unconfirmed and the interventions regimen were different. The subjective outcomes is likely to be influenced by this fact.</p> | <p>LOW</p> <p>No substantial losses</p> | <p>UNCLEAR</p> <p>Study protocol not available. Not found.</p>                                   | <p>LOW</p> <p>No other sources of bias</p> |

|                                |                                                                                                                                                                         |                                                                                                                                                                                                        |                                                                                                |                                                                                                                                                                    |                                               |                                                                 |                                 |
|--------------------------------|-------------------------------------------------------------------------------------------------------------------------------------------------------------------------|--------------------------------------------------------------------------------------------------------------------------------------------------------------------------------------------------------|------------------------------------------------------------------------------------------------|--------------------------------------------------------------------------------------------------------------------------------------------------------------------|-----------------------------------------------|-----------------------------------------------------------------|---------------------------------|
| <b>McGowan et al 1977</b>      | UNCLEAR<br>Comment:<br>Insufficient information on random sequence generation.                                                                                          | LOW<br>Quote: " <i>coded envelope containing either 20 x 200 mg tablets of metronidazole or 20 x 250 mg tablets of phenymethylpenicilin</i> " Comment:<br>Allocation concealment adequately described. | LOW<br>Quote: " <i>Neither the clinician nor the patient knew which drug was being taken</i> " | LOW<br>Quote: " <i>Neither the clinician nor the patient knew which drug was being taken</i> "                                                                     | HIGH<br>Comment:<br>High rate of losses (27%) | UNCLEAR<br>Comment:<br>Study protocol not available. Not found. | LOW<br>No other sources of bias |
| <b>Sezer et al., 2012</b>      | UNCLEAR<br>Quote: " <i>patients were randomly assigned to one of three LLLT groups or a placebo group.</i> "<br>Insufficient information on random sequence generation. | UNCLEAR<br>Comment:<br>Insufficient information on allocation concealment.                                                                                                                             | LOW<br>Quote: " <i>The participants were blinded as to which treatment they received.</i> "    | LOW<br>Quote:<br>Measurements at all visits for a given subject were made by one calibrated examiner who was not involved in providing treatment during the study. | LOW<br>Comment:<br>No losses                  | UNCLEAR<br>Study protocol not available. Not found.             | LOW<br>No other sources of bias |
| <b>Shahakbari et al., 2014</b> | UNCLEAR<br>Comment:<br>Insufficient information on random sequence generation.                                                                                          | UNCLEAR<br>Comment:<br>Insufficient information on allocation concealment.                                                                                                                             | LOW<br>Quote: The patients had no idea of the mouthwash type provided.                         | LOW<br>Quote:<br>Measurements were made by the second calibrated operator who had no idea to which group the patient had been assigned.                            | LOW<br>Comment:<br>No substantial losses (3%) | UNCLEAR<br>Study protocol not available. Not found.             | LOW<br>No other sources of bias |

**Table S2.** Summary of findings table (GRADE approach).

|                                                                                                                                                                                                                                                     |                                                                                      |                                                              |                             |                                 |                                       |                                                                                                                                   |  |  |  |  |
|-----------------------------------------------------------------------------------------------------------------------------------------------------------------------------------------------------------------------------------------------------|--------------------------------------------------------------------------------------|--------------------------------------------------------------|-----------------------------|---------------------------------|---------------------------------------|-----------------------------------------------------------------------------------------------------------------------------------|--|--|--|--|
| 1. Conventional treatment associated with antimicrobial photodynamic therapy (aPDT) <i>versus</i> conventional treatment                                                                                                                            |                                                                                      |                                                              |                             |                                 |                                       |                                                                                                                                   |  |  |  |  |
| 2. Patient or population: Pericoronitis                                                                                                                                                                                                             |                                                                                      |                                                              |                             |                                 |                                       |                                                                                                                                   |  |  |  |  |
| 3. Setting: Ambulatory (outpatients)                                                                                                                                                                                                                |                                                                                      |                                                              |                             |                                 |                                       |                                                                                                                                   |  |  |  |  |
| 4. Intervention: Conventional treatment protocol associated with antimicrobial photodynamic therapy (aPDT)                                                                                                                                          |                                                                                      |                                                              |                             |                                 |                                       |                                                                                                                                   |  |  |  |  |
| 5. Comparison: Conventional treatment protocol                                                                                                                                                                                                      |                                                                                      |                                                              |                             |                                 |                                       |                                                                                                                                   |  |  |  |  |
| 6. Outcomes                                                                                                                                                                                                                                         | 7. Anticipated absolute effects* (95% CI)                                            |                                                              | 8. Relative effect (95% CI) | 9. No of participants (studies) | 10. Certainty of the evidence (GRADE) | 11. Comments                                                                                                                      |  |  |  |  |
|                                                                                                                                                                                                                                                     | 12. Risk with Conventional treatment                                                 | 13. Risk with Conventional treatment + aPDT                  |                             |                                 |                                       |                                                                                                                                   |  |  |  |  |
| 14. Pain assessed with: VAS Scale from: 0 to 10 follow-up: mean 14 days                                                                                                                                                                             | 15. The mean pain was <b>2.4</b> points                                              | 16. MD <b>0.4 points higher</b> (0.19 higher to 0.61 higher) | 17. -                       | 18. 59 (1 RCT)                  | 19. ⊕○○○ Very low <sup>a,b</sup>      | 20. The evidence is very uncertain about the effect of conventional treatment + aPDT on pain relief.                              |  |  |  |  |
| 21. Reduction of pro-inflammatory cytokines TNFα assessed with: pg/mL follow-up: mean 14 days                                                                                                                                                       | 22. The mean reduction of pro-inflammatory cytokines TNFα was <b>269</b> pg/mL       | 23. MD <b>128 pg/mL lower</b> (185.47 lower to 70.53 lower)  | 24. -                       | 25. 59 (1 RCT)                  | 26. ⊕○○○ Very low <sup>a,b</sup>      | 27. The evidence is very uncertain about the effect of conventional treatment + aPDT on reducing pro-inflammatory cytokines TNFα. |  |  |  |  |
| 28. Reduction of pro-inflammatory cytokines IL-6 assessed with: pg/mL follow-up: mean 14 days                                                                                                                                                       | 30. The mean reduction of pro-inflammatory cytokines IL-6 was <b>47</b> pg/mL        | 31. MD <b>2 pg/mL lower</b> (10.72 lower to 6.72 higher)     | 32. -                       | 33. 59 (1 RCT)                  | 34. ⊕○○○ Very low <sup>a,b</sup>      | 35. The evidence is very uncertain about the effect of conventional treatment + aPDT on reducing pro-inflammatory cytokines IL-6. |  |  |  |  |
| 36. Microbiological count - Porphyromonas gingivalis assessed with: CFU/mL follow-up: mean 14 days                                                                                                                                                  | 38. The mean microbiological count - Porphyromonas gingivalis was <b>3.86</b> CFU/mL | 39. MD <b>2.72 CFU/mL lower</b> (3.9 lower to 1.54 lower)    | 40. -                       | 41. 59 (1 RCT)                  | 42. ⊕⊕○○ Low <sup>a,c</sup>           | 43. Conventional treatment + aPDT may reduce/have little to no effect on microbiological count - Porphyromonas gingivalis.        |  |  |  |  |
| 44. Microbiological count - Tannerella forsythia assessed with: CFU/mL follow-up: mean 14 days                                                                                                                                                      | 46. The mean microbiological count - Tannerella forsythia was <b>3.7</b> CFU/mL      | 47. MD <b>0.98 CFU/mL lower</b> (1.76 lower to 0.2 lower)    | 48. -                       | 49. 59 (1 RCT)                  | 50. ⊕⊕○○ Low <sup>a,c</sup>           | 51. Conventional treatment + aPDT may reduce/have little to no effect on microbiological count - Tannerella forsythia.            |  |  |  |  |
| 52. *The risk in the intervention group (and its 95% confidence interval) is based on the assumed risk in the comparison group and the <b>relative effect</b> of the intervention (and its 95% CI).<br>CI: confidence interval; MD: mean difference |                                                                                      |                                                              |                             |                                 |                                       |                                                                                                                                   |  |  |  |  |

|                                                                                                                          |                                           |                                             |                             |                                                 |                                       |
|--------------------------------------------------------------------------------------------------------------------------|-------------------------------------------|---------------------------------------------|-----------------------------|-------------------------------------------------|---------------------------------------|
| 1. Conventional treatment associated with antimicrobial photodynamic therapy (aPDT) <i>versus</i> conventional treatment |                                           |                                             |                             |                                                 |                                       |
| 2. Patient or population: Pericoronitis                                                                                  |                                           |                                             |                             |                                                 |                                       |
| 3. Setting: Ambulatory (outpatients)                                                                                     |                                           |                                             |                             |                                                 |                                       |
| 4. Intervention: Conventional treatment protocol associated with antimicrobial photodynamic therapy (aPDT)               |                                           |                                             |                             |                                                 |                                       |
| 5. Comparison: Conventional treatment protocol                                                                           |                                           |                                             |                             |                                                 |                                       |
| 6. Outcomes                                                                                                              | 7. Anticipated absolute effects* (95% CI) |                                             |                             |                                                 |                                       |
|                                                                                                                          | 12. Risk with Conventional treatment      | 13. Risk with Conventional treatment + aPDT | 8. Relative effect (95% CI) | 9. No of participants of the evidence (studies) | 10. Certainty of the evidence (GRADE) |
| 11. Comments                                                                                                             |                                           |                                             |                             |                                                 |                                       |

## 53. GRADE Working Group grades of evidence

**High certainty:** we are very confident that the true effect lies close to that of the estimate of the effect.

**Moderate certainty:** we are moderately confident in the effect estimate: the true effect is likely to be close to the estimate of the effect, but there is a possibility that it is substantially different.

**Low certainty:** our confidence in the effect estimate is limited: the true effect may be substantially different from the estimate of the effect.

**Very low certainty:** we have very little confidence in the effect estimate: the true effect is likely to be substantially different from the estimate of effect.

Explanations: a. Downgraded two levels due to methodological limitations: unclear random sequence generation and high risk for blinding participants, personnel, and outcome assessors. b. Downgraded two levels due to imprecision (small sample size, wide confidence interval, single study). c. Downgraded one level due to imprecision (small sample size, single study).

**Table S3.** Search strategies (run on August 24<sup>th</sup> 2021).

| Database                 | Search strategy                                                                                  | Results    |
|--------------------------|--------------------------------------------------------------------------------------------------|------------|
| MEDLINE<br>(via Pubmed)  | #1 "Pericoronitis"[Mesh] OR Pericoronitides                                                      | 623        |
| CENTRAL                  | #1 MeSH descriptor: [Pericoronitis] explode all trees                                            | 23         |
| LILACS/BBO<br>(via BVS)  | #1 MH: Pericoronite OR Pericoronitis OR Pericoronitis OR Pericoronarite OR C07.465.714.258.771   | 74         |
| EMBASE<br>(via Elsevier) | #1 'gingiva disease'/exp AND pericoronitis AND [embase]/lim NOT ([embase]/lim AND [medline]/lim) | 78         |
| Clinicaltrials.gov       | #1 Pericoronitis                                                                                 | 6          |
| WHO/ICTRP                | #1 Pericoronitis                                                                                 | 19         |
| OpenGrey                 | #1 Pericoronitis                                                                                 | 0          |
| <b>Total</b>             |                                                                                                  | <b>823</b> |
